1 **Anthropometric measures and their relationship to corneal refractive power in the United**  
2 **States population**

3 Girish Valluru MS<sup>1</sup>, Daniel Henick BS<sup>1</sup>, Janek Klawe MA, Bian Liu PhD<sup>1</sup>, Louis R. Pasquale  
4 MD<sup>1,2</sup>, Sumayya Ahmad MD<sup>1</sup>

5  
6 <sup>1</sup> Department of Ophthalmology, Icahn School of Medicine at Mount Sinai,  
7 New York, NY USA

8 <sup>2</sup> The Eye and Vision Research Institute of New York Eye and Ear Infirmary at Mount Sinai,  
9 New York, NY, USA

10  
11  
12  
13  
14  
15  
16  
17  
18  
19  
20  
21  
22  
23  
24  
25  
26  
27

Correspondence may be addressed to:  
Sumayya Ahmad M.D.  
1 Gustave L. Levy Place  
Box 1183  
New York, NY 10029  
(sumayya.ahmad@mountsinai.org)

COI: Dr. Pasquale is supported by NEI EY015473 and the New York Eye and Ear Infirmary Foundation. He is a consultant to Eyenovia, Twenty-twenty and Skye Biosciences. Dr. Ahmad is supported by the New York Eye and Ear Infirmary Foundation.

28 **Abstract (239/250)**

29

30 **Purpose:** To determine the relationship between anthropometric measures and corneal refractive  
31 power (CRP).

32

33 **Methods:** Participants from the 1999-2008 United States National Health and Nutrition  
34 Examination Survey (NHANES) visual exam with demographic, ocular, and anthropometric data  
35 (20,165 subjects) were included. Cases with steep cornea were defined by corneal power  $\geq 48.0$   
36 diopters (n = 171) while controls had dioptric power  $< 48.0$  D (n = 19,994). Multivariable  
37 analyses were performed for pooled and sex-stratified populations. Separate models assessed  
38 body mass index, height, and weight in relation to steep cornea.

39

40 **Results:** A relationship between BMI and steep cornea in the pooled population was not detected  
41 (P for trend = 0.78). There was a strong inverse relationship between height and steep cornea in  
42 the pooled population (P for trend  $< 0.0001$ ) and women (P for trend  $< 0.0001$ ). For every 1-inch  
43 increase in height, there was a 16% reduced odds of steep cornea in the pooled population (OR,  
44 0.84; 95% CI: 0.78-0.91). There was also a significant inverse relationship between weight and  
45 steep cornea in the pooled population (P for trend = 0.01) and in men (P for trend = 0.02). For  
46 each 10-pound increase in weight there was a 7% reduced odds of steep cornea (OR, 0.927; 95%  
47 CI: 0.882-0.975) in the pooled analysis.

48

49 **Conclusions:** Greater height and greater weight were associated with a lower risk of steep  
50 cornea. These findings can contribute to an improved understanding of the pathogenesis of  
51 corneal ectasias.

52

53

54

55 **Introduction:**

56 Corneal refractive power (CRP) is an important clinical parameter in clinical practice for  
57 patients seeking refractive or cataract surgery. High corneal refractive power can indicate  
58 pathologic processes such as corneal ectasias like keratoconus and pellucid marginal  
59 degeneration.<sup>1,2</sup> There is an intimate relationship between CRP and other ocular components  
60 such as axial length, anterior chamber depth, and lens thickness, with evidence that the eye often  
61 achieves emmetropia despite differences in these parameters.<sup>3,4</sup> While there is a defined  
62 relationship between other ocular components and CRP, the relationship between CRP and  
63 anthropometric features is less clear.

64 Previous studies have explored these relationships and found variable results.<sup>5-10</sup> Lee  
65 found an inverse relationship between corneal steepness and height after adjusting for  
66 confounders.<sup>9</sup> Wong et al.'s population-based study in Singapore demonstrated the same results,  
67 as well as a positive relationship between weight and hyperopic refractions.<sup>10</sup> While these studies  
68 suggest evidence of an inverse relationship between CRP/corneal radius and height, few papers  
69 have specifically examined anthropometric parameters in patients on patients with high CRP, a  
70 population which may represent those with corneal pathology. To date, the Central India Eye and  
71 Medical Study, the Beijing Eye study, and the Singapore Epidemiology of Eye Diseases Study  
72 have specifically examined anthropometric parameters on patients with steep corneas.<sup>6-8</sup>  
73 However, these studies did not account for the confounding effects between the various  
74 anthropometric measures, had smaller sample sizes, and looked at ethnically homogenous  
75 populations.

76 The purpose of the current study was to investigate the relationship between  
77 anthropometric features and steep corneas (those with a spherical dioptric power of  $\geq 48$  D)  
78 using the National Health and Nutrition Examination Survey (NHANES). In doing so, we aimed  
79 to use methodology designed to assess the independent associations of height and of weight with  
80 CRP.

81  
82

83 **Methods:**

84 **Data Sources**

85 We used data from the 1999-2008 National Health and Nutrition Examination Survey  
86 (NHANES). The NHANES has been described previously. Briefly, it is a nationally  
87 representative survey of the US civilian, noninstitutionalized population with data on  
88 demographics, lifestyle, anthropometric measures, and also ocular health.<sup>11</sup>

89 The 1999-2008 NHANES was reviewed and approved by the National Center for Health  
90 Statistics Research Ethics Review Board. All participants provided written informed consent.

91 **Study Population Selection**

92 We included all NHANES participants who met the following criteria: they took part in the  
93 visual exam; provided demographic data (age, gender, race, education, socioeconomic status)  
94 and general health information (on asthma, hypertension, and diabetes); anthropometric  
95 measures (height, weight); were older than 20 years (to account for continuing changes in  
96 height<sup>12</sup>); and had not had cataract or refractive eye surgery.

97 **Anthropometric Measurements**

98 During visits at the mobile examination center, trained health technicians directly measured  
99 anthropometric features. A stadiometer was used to measure standing height to the nearest 0.1  
100 centimeter. Weight was measured to the nearest 0.1 kilogram using a Toledo digital scale  
101 (Mettler-Toledo Inc.).

102 **Outcome Measures**

103 Participants were examined using an autorefractor (NIDEK ARK-760; Nidek Co Ltd, Tokyo,  
104 Japan) in order to measure keratometry power in both eyes. For each eye, the dioptric power of  
105 the cornea was averaged across the meridians. Patients were examined in a non-cycloplegic state  
106 with final values from an average of three measurements.<sup>13</sup> We defined steep cornea as a  
107 spherical dioptric power  $\geq 48.0$  diopters D in the eye with higher dioptric power. This cutoff was  
108 chosen for consistency with prior studies defining steep corneas as keratometry values  $\geq 48$  D.<sup>6,8</sup>

109 **Statistical Analysis**

110 We used multivariable logistic regression models to assess the association of the primary  
111 exposure of an anthropometric measure (while adjusting for covariates of demographic factors  
112 and comorbidities as discussed further below) with the outcome variable of the presence of steep  
113 cornea. All analyses took into account NHANES survey design. SAS statistical software version  
114 9.2 (SAS Institute, Cary, NC) and R statistical software version 1.1 (R Foundation, Vienna,  
115 Austria) were used for analysis.

116 **Anthropometric Measures**

117 **Uncorrelated Height and Weight analysis:**

118 Although BMI incorporates both height and weight, we were interested in assessing the  
119 independent associations of height and weight with steep corneas. Thus we performed a  
120 regression of height with weight as the exposure. This regression was used to calculate residuals  
121 of height that were centered at the median height of the population (66 inches) providing an  
122 uncorrelated height. For gender-specific analyses we repeated this process and centered at the  
123 median heights for men (69 inches) and women (64 inches). The resulting uncorrelated height  
124 and weight were included in a multivariable model to determine their association with steep  
125 cornea. This same process was repeated for weight residuals centered at the median weight of the  
126 entire population (172 lbs) and in gender-stratified analyses for men (187 lbs) and women (157  
127 lbs).

### 128 **Regression Models**

129 We fit multivariable logistic regression models with primary exposures of (1) BMI, (2) height,  
130 and (3) weight, and an outcome of the presence (vs. absence) of steep cornea. The first model  
131 had a primary exposure of BMI (bucketed into 5 categories), adjusting for gender, race,  
132 educational level, socioeconomic status, age, and comorbidities (asthma, HTN, and diabetes).  
133 The second model had a primary exposure of height adjusting for uncorrelated weight and the  
134 same covariates. The third model had a primary exposure of weight adjusting for uncorrelated  
135 height and the same covariates. These models were repeated with primary exposures as  
136 continuous variables to assess for linear relationships. Given the substantially larger range of  
137 weight as compared to height or BMI, weight was assessed as a continuous variable per 10  
138 pounds. Outliers (1 case and 82 controls) in terms of measured data for BMI, height, and weight  
139 that were 3 times the interquartile range greater than the third quartile or lesser than the first  
140 quartile were not included in the analysis shown.<sup>14</sup> Sensitivity analysis was conducted with  
141 outliers included (data not shown) and is further described in the results.

142 In order to assess the role of gender with each of the three primary exposures, three approaches  
143 were used: (1) gender was adjusted for as a covariate in multivariable regressions with the  
144 pooled analyses; (2) multivariable models with an interaction term between gender and the  
145 primary exposure were assessed; and (3) models were assessed for the entire population and then  
146 repeated with gender stratification.

147 **Results**

148 Among 20,165 individuals, 171 cases of steep corneas were identified. In the overall population  
149 (Table 1), the mean age for controls was 46 years (range, 20-85; 95% CI 45.8-46.9) and for cases  
150 was 44 years (range, 20-85; 95% CI 41.4-47.1). Women comprised 52% (95% CI 50.9-52.2) of  
151 the overall population. Notably, there were more women among cases (68%; 95% CI 59.2-76.8)  
152 than controls (51%; 95% CI 50.8-52.0). There were also more individuals with asthma in cases  
153 (23%; 95% CI 14.0-32.5) than among controls (13%; 95% CI 12.2-13.5).

154 There were notable differences in sex-stratified analysis (Table S1). Among women, there were  
155 more cases with asthma (28%; 95% CI 16.6-39.2) than controls (15%; 95% CI 13.6-15.5).  
156 Among men, there were more cases who were non-Hispanic whites (83%; 95% CI 74.5-90.7)  
157 than controls (73%; 95% CI 70.2-75.3). All differences were adjusted for in multivariable  
158 analysis.

159 **The relationship between body-mass index and steep cornea** (Table 2)

160 A relationship between categories of BMI and steep cornea was not detected in the pooled  
161 population in categorical analysis ( $p$  for trend = 0.78). A relationship between linear BMI and  
162 steep cornea was also not detected ( $p=0.86$ ).

163 In sex stratified analysis, there was a nonsignificant negative relationship between categorical  
164 BMI and odds of steep cornea in men ( $p$  for trend = 0.21). When BMI was considered as a  
165 continuous variable, each unit increase in BMI was associated with a 6% reduced odds of steep  
166 cornea in men (OR, 0.94; 95% CI 0.878-0.995). While inclusion of outliers did change the  
167 borderline significance of this association, it did not meaningfully change the reduced odds of  
168 steep cornea in men per unit increase in BMI (OR, 0.95; 95% CI 0.889-1.006). Analysis of the  
169 BMI categories ( $p = 0.33$ , for trend) and of linear BMI showed no significant associations with  
170 steep cornea in women ( $p = 0.45$ ). When using the existing categories (Table S1), there was not a  
171 significant interaction between BMI and gender in association with steep cornea ( $p = 0.41$ , Table  
172 S2) in categorical analysis.

173 **The relationship between height and steep cornea** (Table 3)

174 There was an inverse relationship between categories of height (adjusted for weight residuals)  
175 and steep cornea ( $p$  for trend  $<0.0001$ ) in the pooled population. Compared to participants  $\leq 62$   
176 inches, for those in the 65.1 – 67-inch category there was a 61% reduced odds (OR, 0.29; 95%  
177 CI 0.16-0.55) of steep cornea and in the tallest category  $\geq 70.1$  inches there was a 82% reduced  
178 odds (OR, 0.18; 95% CI 0.07-0.47). The relation between linear height and steep cornea was  
179 robust ( $p<0.0001$ ). For every 1-inch increase in height adjusted for weight residuals, there was a  
180 16% reduced odds of steep cornea (OR, 0.84; 95% CI 0.78-0.91).

181 In gender specific analysis, this relationship between height adjusted for weight residuals and  
182 steep cornea was also significant in women. For every 1-inch increase in height there was a 19%  
183 reduced odds of steep cornea (OR, 0.81; 95% CI 0.74-0.88;  $p < 0.0001$ ).

184 The relationship between height adjusted for weight residuals and steep cornea in men showed  
185 equivocal results. In multivariable analysis, only one category of height (69.1-71 inches) showed  
186 an inverse relationship with steep cornea (OR, 0.25; 95% CI: 0.09-0.70) compared to the  
187 reference category ( $\leq 66$  inches) in men. There was a borderline significant association between  
188 height and steep cornea in men when assessed for a linear relationship (OR, 0.88; 95% CI 0.76-  
189 1.01;  $p = 0.074$ ).

190 We explored a potential gender-height interaction in relation to steep cornea in several  
191 multivariable models. When height was treated as a continuous variable, no significant  
192 interaction was found (interaction coefficient -0.03; 95% CI -0.08 to 0.03,  $p = 0.35$ ; Table S3).  
193 Further, when we readjusted the categories for the inherent differences in height between men  
194 and women no significant interaction was noted ( $p = 0.59$ ; Table S5).

#### 195 **The relationship between weight and steep cornea** (Table 4)

196 There was an inverse relationship between categories of weight (adjusted for height residuals)  
197 and steep cornea ( $p$  for trend = 0.011) in the pooled population. While there is a trend between  
198 categories of weight and their association with steep cornea, only the highest category of weight  
199 (200.1 lbs+) showed a statistically significant inverse relationship with steep cornea (OR, 0.45;  
200 95% CI: 0.24-0.85) compared to the reference category ( $\leq 140$  lbs). When weight was considered  
201 as a linear variable, every 10-pound increase in weight had a 7% reduced odds of steep cornea  
202 (OR, 0.927; 95% CI: 0.882-0.975;  $p = 0.0038$ ).

203 In sex stratified analysis, there was not a significant association between weight adjusted for  
204 height residuals and steep cornea in women in both categorical ( $p = 0.75$ ) and linear analyses per  
205 10-pound increase ( $p = 0.64$ ). Among men, for each 10-pound increase in weight there was 12%  
206 reduced odds of steep cornea (OR, 0.885; 95% CI: 0.809-0.968;  $p = 0.0083$ ). While there were  
207 modest differences in the associations of steep cornea and weight in sex-stratified analysis, there  
208 was not a significant interaction between weight and gender in relationship to steep cornea  
209 (interaction coefficient 0.02; 95% CI -0.01 to 0.04,  $p = 0.16$ , Table S4).

210

211

## 212 Discussion

213 This retrospective cross-sectional study found a substantial inverse association between  
214 height and steep cornea. Notably, this relationship, when adjusting for uncorrelated weight, was  
215 significant in the total population and in women. Weight, adjusted for uncorrelated height, was  
216 also inversely associated with steep cornea in the total population and in a sex-stratified analysis  
217 for men, but not for women. There was no significant association between BMI and steep cornea.

218 Height had the strongest association with steep cornea; for each 1-inch increase in height  
219 there were 16% lower odds of steep cornea in the pooled population, while in women there was a  
220 19% reduction. Studies in India and Singapore have identified a similar inverse relationship  
221 between height and corneas with  $K > 48$ , even after adjusting for other variables.<sup>6-8</sup> The Beijing  
222 eye study had similar results until adjustment for other ocular characteristics (i.e. axial length,  
223 cylindrical refractive error, etc.). None of these three studies used residuals to de-correlate the  
224 height and weight variables. Our study, in context of those that have shown a similar  
225 relationship, suggest a possible genetic relationship between height and steep corneas.

226 There is a complex connection between corneal curvature/steepness and other ocular  
227 features such as axial length and anterior chamber depth. Longer axial lengths are often  
228 associated with flatter corneas and shorter axial lengths are associated with steeper corneas, in an  
229 effort of the eye to achieve emmetropization. It has been theorized that those with shorter height  
230 may also have smaller axial lengths, and secondarily develop steeper corneas. It has also been  
231 speculated that educational status is associated within better nutrition and taller height, which  
232 may lead to myopia and longer axial length. Previous researchers have examined these  
233 relationships.<sup>7,9,10</sup> Wong et al. found that that height had a strong correlation to multiple ocular  
234 parameters (axial length, corneal curvature, anterior chamber and vitreous chamber depth) that is  
235 independent of education, weight, gender, and other systemic and lifestyle factors. Lee et al also  
236 found that height was independently associated with corneal curvature after controlling for  
237 education, gender, and age.<sup>9</sup> Our study also showed that the effect of height persists after  
238 adjusting for education, race, and socioeconomic status, challenging the hypothesis of education  
239 being a surrogate marker for height, better nutrition and longer axial lengths.

240 Although other studies used the term “keratoconus (KCN)” interchangeably with  $K > 48$ ,  
241 we felt that using this definition would mis-classify many individuals. Keratoconus is a clinical  
242 diagnosis that relies on both the clinical exam and corneal imaging findings (either tomography  
243 or topography). Using a diopter cut-off value may result in people with corneal scars being  
244 incorrectly labeled as having KCN, but also may miss those with early disease. Nonetheless,  
245 many people in our analysis likely did have true KCN, and the relationship between KCN and  
246 height warrants discussion. There are known associations between connective tissue disorders,  
247 with varying height relationships, and KCN, suggesting an underlying role of connective tissue  
248 dysfunction.<sup>2,15</sup> Notably, reports of greater prevalence of mitral valve prolapse in individuals  
249 with KCN when compared to controls suggest that alterations in collagen subtypes during  
250 embryogenesis may lead to changes in the corneal stroma as well as mitral valve formation.<sup>15-17</sup>  
251 There may be a genetic basis for the association between height and KCN as both height and  
252 central corneal thickness (strongly associated with KCN) have substantial heritability with



253 estimates up to 80% and 95%, respectively.<sup>18,19</sup> Further study of this association may elucidate  
254 these genetic underpinnings.

255 Estrogen may contribute to the association of steeper corneas and shorter height.  
256 Estrogen plays an important role in the development of height promoting early epiphyseal  
257 growth plate closure and resulting in shorter height.<sup>20,21</sup> In genetic studies, estrogen receptor  
258 polymorphisms have been associated with decreased height.<sup>22,23</sup> Healthy women have also  
259 demonstrated changes in corneal curvature and thickness during the menstrual cycle, menopause,  
260 and with topical estrogen therapy.<sup>24-26</sup> Although most studies on estrogen and corneal  
261 topographic changes are predominantly in women, further study is needed to characterize  
262 estrogen effects on corneal topography in men.

263 While our analyses did not identify notable interactions between anthropometric features  
264 and gender in relationship to steep cornea, this may have been due to limited sample size and  
265 further in the case of height, inherent gender differences in distributions. Prior studies have  
266 reported the relationship between gender and steep cornea and anthropometric features.<sup>6-8</sup> Some  
267 studies found that once height was included, a gender association with steep cornea was no  
268 longer significant, similar to what we found.<sup>6-8</sup> Our findings on the confounding effects of height  
269 or weight on the relationship between gender and steep cornea (see supplement) may provide  
270 insight on these differing associations.<sup>27-29</sup> Further investigation with case-control studies may  
271 enable detection of associations and interactions between anthropometric features and gender in  
272 people with steep corneas.

273 In addition to the inverse relationship between height and steep cornea, we also found a  
274 significant association between weight and steep cornea; there was a 7% reduced odds of steep  
275 cornea per 10 pound increase in weight. Similarly, in men there was a 12% reduced odds of steep  
276 cornea per 10 pound increase in weight. A potential biological basis for this relationship may be  
277 related to hormones. Prolactin, which is found at higher levels in patients with obesity, and the  
278 related prolactin induced protein, may mediate transcription, translation, and organization of  
279 keratin in the cornea.<sup>30-33</sup> Interestingly, prolactin induced protein levels are downregulated in  
280 tears, saliva, and corneal fibroblast cells from individuals with KCN compared to healthy  
281 individuals.<sup>30</sup>

282 There was no meaningful association between BMI and steep cornea in our pooled  
283 analysis. In men, a modest association between BMI and steep cornea was detected; they were  
284 found to have a 6% reduced odds of steep cornea per unit increase in BMI. Finally, there were no  
285 significant categorical interactions with gender and BMI ( $p = 0.41$ ) or gender and weight ( $p =$   
286  $0.61$ ) in steep cornea. There are mixed findings in the literature regarding the relationship  
287 between steep cornea and BMI.<sup>6-8</sup> Although some studies<sup>6-8</sup> similarly did not find an association  
288 between BMI and steep cornea, another paper from Israel by Eliasi et al. found a strong  
289 relationship between KCN (as defined by patients with  $K > 48$ ) and BMI.<sup>5</sup> While both our study  
290 and that of Eliasi adjust for age, their narrow age inclusion criteria (16-19.9 years old) may be  
291 contributing to the differences in our findings.

292 Our study has several limitations. First, although we adjusted our models for a number of

293 important confounding factors, the NHANES did not collect other ocular parameters such as  
294 CCT or axial length, which have been included as covariates in other studies.<sup>6-8</sup> This may be  
295 needed to better understand their role in this association. Finally, we cannot draw causal  
296 inferences from our analyses with the cross-sectional data of the NHANES. We acknowledge  
297 this limitation and further studies using different methodologies will be needed to address causal  
298 relationships.

299 Strengths of this study included the use of uncorrelated height and weight in analyses to  
300 assess their independent associations with steep cornea. This allowed greater power to detect  
301 associations with steep cornea and enables stronger associations to be identified. The NHANES  
302 has highly standardized and calibrated methodology allowing for accurate and direct  
303 measurements of anthropometric features and keratometry, both of which were measured in the  
304 same visit.<sup>34</sup> Further, our analysis used multiple logistic regression to account for a number of  
305 covariates including age, race, education, socioeconomic status, and comorbidities (asthma,  
306 hypertension, and diabetes). Finally, the NHANES database multilevel complex sampling  
307 methodology enables findings applicable to a nationally representative US population.

308 In conclusion, there is an inverse association between height, independent of weight, and  
309 steep cornea. There is also an inverse relationship between weight, independent of height, and  
310 steep cornea. Further study of the relationships of height and weight with steep cornea may yield  
311 mechanistic insight into the pathogenesis of corneal ectasias as well as genetic correlations.

312

313 **References:**

- 314 1. Jinabhai A, Radhakrishnan H, O'Donnell C. Pellucid corneal marginal degeneration: A  
315 review. *Contact Lens and Anterior Eye*. 2011;34(2):56-63. doi:10.1016/j.clae.2010.11.007
- 316 2. Mas Tur V, MacGregor C, Jayaswal R, O'Brart D, Maycock N. A review of keratoconus:  
317 Diagnosis, pathophysiology, and genetics. *Survey of Ophthalmology*. 2017;62(6):770-783.  
318 doi:10.1016/j.survophthal.2017.06.009
- 319 3. François J, Goes F. Ultrasonographic study of 100 emmetropic eyes. *Ophthalmologica*.  
320 1977;175(6):321-327. doi:10.1159/000308676
- 321 4. Grosvenor T, Goss DA. Role of the cornea in emmetropia and myopia. *Optom Vis Sci*.  
322 1998;75(2):132-145. doi:10.1097/00006324-199802000-00017
- 323 5. Eliasi E, Bez M, Megreli J, et al. The association between keratoconus and body mass  
324 index: a population-based cross-sectional study among half a million adolescents. *American*  
325 *Journal of Ophthalmology*. Published online December 2020:S0002939420306553.  
326 doi:10.1016/j.ajo.2020.11.021
- 327 6. Jonas JB, Nangia V, Matin A, Kulkarni M, Bhojwani K. Prevalence and Associations of  
328 Keratoconus in Rural Maharashtra in Central India: The Central India Eye and Medical  
329 Study. *American Journal of Ophthalmology*. 2009;148(5):760-765.  
330 doi:10.1016/j.ajo.2009.06.024
- 331 7. Pan C-W, Cheng C-Y, Sabanayagam C, et al. Ethnic Variation in Central Corneal  
332 Refractive Power and Steep Cornea in Asians. *Ophthalmic Epidemiology*. 2014;21(2):99-  
333 105. doi:10.3109/09286586.2014.887735
- 334 8. Xu L, Wang YX, Guo Y, You QS, Jonas JB, the Beijing Eye Study Group. Prevalence and  
335 Associations of Steep Cornea/Keratoconus in Greater Beijing. The Beijing Eye Study. Yu  
336 F-S, ed. *PLoS ONE*. 2012;7(7):e39313. doi:10.1371/journal.pone.0039313
- 337 9. Lee KE. Association of Age, Stature, and Education With Ocular Dimensions in an Older  
338 White Population. *Arch Ophthalmol*. 2009;127(1):88.  
339 doi:10.1001/archophthalmol.2008.521
- 340 10. Wong TY, Foster PJ, Johnson GJ, Klein BEK, Seah SKL. The Relationship between Ocular  
341 Dimensions and Refraction with Adult Stature: The Tanjong Pagar Survey. 2001;42(6):6.
- 342 11. Engel A, Murphy RS, Maurer K, Collins E. Plan and operation of the HANES I  
343 augmentation survey of adults 25-74 years United States, 1974-1975 - PubMed. Accessed  
344 December 19, 2020. <https://pubmed.ncbi.nlm.nih.gov/eresources.mssm.edu/695333/>
- 345 12. Kelly A, Winer KK, Kalkwarf H, et al. Age-Based Reference Ranges for Annual Height  
346 Velocity in US Children. *The Journal of Clinical Endocrinology & Metabolism*.  
347 2014;99(6):2104-2112. doi:10.1210/jc.2013-4455

- 348 13. National Health and Nutrition Examination Survey (NHANES): Vision Procedures Manual.  
349 Accessed January 18, 2021. <https://wwwn.cdc.gov/nchs/data/nhanes/2001-2002/manuals>
- 350 14. Hoaglin DC, Iglewicz B, Tukey JW. Performance of Some Resistant Rules for Outlier  
351 Labeling. *Journal of the American Statistical Association*. 1986;81(396):991-999.  
352 doi:10.2307/2289073
- 353 15. Edwards M, McGhee CN, Dean S. The genetics of keratoconus. *Clinical & Experimental*  
354 *Ophthalmology*. 2001;29(6):345-351. doi:[https://doi.org/10.1046/j.1442-9071.2001.d01-](https://doi.org/10.1046/j.1442-9071.2001.d01-16.x)  
355 16.x
- 356 16. Sharif KW, Casey TA, Coltart J. Prevalence of mitral valve prolapse in keratoconus  
357 patients. *J R Soc Med*. 1992;85(8):446-448.
- 358 17. Beardsley TL, Foulks GN. An Association of Keratoconus and Mitral Valve Prolapse.  
359 *Ophthalmology*. 1982;89(1):35-37. doi:10.1016/S0161-6420(82)34857-5
- 360 18. Visscher PM, Hill WG, Wray NR. Heritability in the genomics era — concepts and  
361 misconceptions. *Nat Rev Genet*. 2008;9(4):255-266. doi:10.1038/nrg2322
- 362 19. Lucas SEM, Burdon KP. Genetic and Environmental Risk Factors for Keratoconus. *Annu*  
363 *Rev Vis Sci*. 2020;6(1):25-46. doi:10.1146/annurev-vision-121219-081723
- 364 20. Cutler GB. The role of estrogen in bone growth and maturation during childhood and  
365 adolescence. *The Journal of Steroid Biochemistry and Molecular Biology*. 1997;61(3):141-  
366 144. doi:10.1016/S0960-0760(97)80005-2
- 367 21. Weise M, De-Levi S, Barnes KM, Gafni RI, Abad V, Baron J. Effects of estrogen on  
368 growth plate senescence and epiphyseal fusion. *Proc Natl Acad Sci U S A*.  
369 2001;98(12):6871-6876. doi:10.1073/pnas.121180498
- 370 22. Schuit SCE, van Meurs JBJ, Bergink AP, et al. Height in Pre- and Postmenopausal Women  
371 Is Influenced by Estrogen Receptor  $\alpha$  Gene Polymorphisms. *The Journal of Clinical*  
372 *Endocrinology & Metabolism*. 2004;89(1):303-309. doi:10.1210/jc.2003-031095
- 373 23. Dahlgren A, Lundmark P, Axelsson T, Lind L, Syvänen A-C. Association of the Estrogen  
374 Receptor 1 (ESR1) Gene with Body Height in Adult Males from Two Swedish Population  
375 Cohorts. Brembs B, ed. *PLoS ONE*. 2008;3(3):e1807. doi:10.1371/journal.pone.0001807
- 376 24. Aydın E, Demir HD, Demirturk F, Caliskan AC, Aytan H, Erkorkmaz U. Corneal  
377 topographic changes in premenopausal and postmenopausal women. *BMC Ophthalmol*.  
378 2007;7(1):9. doi:10.1186/1471-2415-7-9
- 379 25. Cavdar E, Ozkaya A, Alkin Z, Ozkaya HM, Babayigit MA. Changes in tear film, corneal  
380 topography, and refractive status in premenopausal women during menstrual cycle. *Contact*  
381 *Lens and Anterior Eye*. 2014;37(3):209-212. doi:10.1016/j.clae.2013.11.005

- 382 26. Soni PS. Effects of oral contraceptive steroids on the thickness of human cornea. *Am J*  
383 *Optom Physiol Opt.* 1980;57(11):825-834. doi:10.1097/00006324-198011000-00008
- 384 27. Hashemi H, Heydarian S, Hooshmand E, et al. The Prevalence and Risk Factors for  
385 Keratoconus: A Systematic Review and Meta-Analysis. *Cornea.* 2020;39(2):263-270.  
386 doi:10.1097/ICO.0000000000002150
- 387 28. Pearson AR, Soneji B, Sarvananthan N, Sandford-Smith JH. Does ethnic origin influence  
388 the incidence or severity of keratoconus? *Eye (Lond).* 2000;14 ( Pt 4):625-628.  
389 doi:10.1038/eye.2000.154
- 390 29. Wagner H, Barr JT, Zadnik K. Collaborative Longitudinal Evaluation of Keratoconus  
391 (CLEK) Study: Methods and findings to date. *Contact Lens and Anterior Eye.*  
392 2007;30(4):223-232. doi:10.1016/j.clae.2007.03.001
- 393 30. Sharif R, Bak-Nielsen S, Hjortdal J, Karamichos D. Pathogenesis of Keratoconus: The  
394 intriguing therapeutic potential of Prolactin-inducible protein. *Progress in Retinal and Eye*  
395 *Research.* 2018;67:150-167. doi:10.1016/j.preteyeres.2018.05.002
- 396 31. Stachon T, Stachon A, Hartmann U, Seitz B, Langenbucher A, Szentmáry N. Urea, Uric  
397 Acid, Prolactin and fT4 Concentrations in Aqueous Humor of Keratoconus Patients.  
398 *Current Eye Research.* 2017;42(6):842-846. doi:10.1080/02713683.2016.1256413
- 399 32. Kopelman PG. Physiopathology of prolactin secretion in obesity. *International Journal of*  
400 *Obesity.* 2000;24(2):S104-S108. doi:10.1038/sj.ijo.0801291
- 401 33. Smith SR. THE ENDOCRINOLOGY OF OBESITY. *Endocrinology and Metabolism*  
402 *Clinics of North America.* 1996;25(4):921-942. doi:10.1016/S0889-8529(05)70362-5
- 403 34. National Health and Nutrition Examination Survey (NHANES): Anthropometry Procedure  
404 Manual. Accessed January 18, 2021.  
405 <https://wwwn.cdc.gov/nchs/nhanes/continuousnhanes/manuals.aspx?BeginYear=2007>
- 406

1

Table 1: Demographic and other characteristics of the National Health and Nutrition Examination Survey sample stratified by keratometry readings

| Characteristics                           | Spherical power < 48 diopters |            | Spherical power ≥ 48.0 diopters |            |
|-------------------------------------------|-------------------------------|------------|---------------------------------|------------|
|                                           | Number                        | Percentage | Number                          | Percentage |
| <b>Gender</b>                             |                               |            |                                 |            |
| Male                                      | 9687                          | 48.6       | 58                              | 32.0       |
| Female                                    | 10307                         | 51.4       | 113                             | 68.0       |
| <b>Age (years)</b>                        |                               |            |                                 |            |
| 20 - 39                                   | 7247                          | 39.3       | 63                              | 41.2       |
| 40 - 59                                   | 6166                          | 39.1       | 53                              | 38.1       |
| ≥ 60                                      | 6581                          | 21.6       | 55                              | 20.7       |
| <b>Race</b>                               |                               |            |                                 |            |
| Mexican American                          | 4002                          | 7.2        | 34                              | 6.7        |
| Other Hispanic                            | 1098                          | 4.8        | 8                               | 2.8        |
| Non-Hispanic white                        | 10229                         | 72.7       | 97                              | 77.2       |
| Non-Hispanic black                        | 3930                          | 10.4       | 29                              | 10.5       |
| Other race                                | 735                           | 4.8        | 3                               | 2.9        |
| <b>Education</b>                          |                               |            |                                 |            |
| Less than High School                     | 5821                          | 18.5       | 49                              | 20.3       |
| High School                               | 4811                          | 25.5       | 48                              | 26.8       |
| Greater than High School                  | 9362                          | 56.1       | 74                              | 52.9       |
| <b>Socioeconomic Status*</b>              |                               |            |                                 |            |
| Above Poverty Line                        | 16341                         | 87.1       | 131                             | 83.8       |
| Below Poverty Line                        | 3653                          | 12.9       | 40                              | 16.2       |
| <b>Comorbidities*</b>                     |                               |            |                                 |            |
| Asthma                                    | 2399                          | 12.9       | 32                              | 23.3       |
| High blood pressure                       | 6393                          | 27.8       | 55                              | 25.9       |
| Diabetes                                  | 2041                          | 7.1        | 21                              | 9.3        |
| <b>Height (inches)</b>                    |                               |            |                                 |            |
| ≤ 62                                      | 3260                          | 12.2       | 59                              | 27.3       |
| 62.1-65                                   | 5075                          | 24.4       | 48                              | 31.4       |
| 65.1-67                                   | 3643                          | 18.1       | 25                              | 15.7       |
| 67.1-70                                   | 4610                          | 24.3       | 21                              | 12.6       |
| 70.1+                                     | 3406                          | 21.1       | 18                              | 13.1       |
| <b>Weight (pounds)</b>                    |                               |            |                                 |            |
| ≤ 140                                     | 3937                          | 19.7       | 50                              | 30.3       |
| 140.1-160                                 | 3756                          | 17.7       | 33                              | 18.5       |
| 160.1-180                                 | 4004                          | 19.3       | 32                              | 17.2       |
| 180.1-200                                 | 3205                          | 16.0       | 24                              | 12.7       |
| 200.1 +                                   | 5092                          | 27.3       | 32                              | 21.3       |
| <b>Body Mass Index (kg/m<sup>2</sup>)</b> |                               |            |                                 |            |
| ≤ 22                                      | 2427                          | 13.8       | 23                              | 14.7       |
| 22.1-25                                   | 3772                          | 20.1       | 30                              | 19.4       |
| 25.1-27                                   | 3018                          | 14.8       | 23                              | 13.6       |
| 27.1-29                                   | 2804                          | 13.3       | 24                              | 15.1       |
| 29.1 +                                    | 7973                          | 38.1       | 71                              | 37.3       |

2 \*Socioeconomic status is calculated by the Center for Disease Control as a ratio of family income to the poverty  
3 line based on annual poverty guidelines specific to family size and geographic location issued by the Department of  
4 Health and Human services. Comorbidities are self-reported by patients based on if a physician has ever told them  
5 they have the condition (i.e. asthma, hypertension, diabetes).

Table 2. Pooled and gender specific analysis of body mass index ( $\text{kg}/\text{m}^2$ ) in relation to steep cornea defined by high spherical dioptric power ( $\geq 48$  D)

| Category of BMI          | Total Population |                 |                                      | Women        |                 |                                      | Men          |                 |                                           |
|--------------------------|------------------|-----------------|--------------------------------------|--------------|-----------------|--------------------------------------|--------------|-----------------|-------------------------------------------|
|                          | No. of Cases     | No. of Controls | *Multivariate Relative Risk (95% CI) | No. of Cases | No. of Controls | *Multivariate Relative Risk (95% CI) | No. of Cases | No. of Controls | *Multivariate Relative Risk (95% CI)      |
| $\leq 22$                | 22               | 2162            | Reference                            | 12           | 1285            | Reference                            | 10           | 877             | Reference                                 |
| 22.1-25                  | 26               | 3398            | 0.90 (0.45-1.77)                     | 19           | 1711            | 1.22 (0.58-2.55)                     | 7            | 1687            | 0.45 (0.12-1.74)                          |
| 25.1-27                  | 23               | 2722            | 1.09 (0.52-2.28)                     | 12           | 1243            | 1.42 (0.52-3.90)                     | 11           | 1479            | 0.57 (0.17-1.91)                          |
| 27.1-29                  | 23               | 2543            | 1.36 (0.59-3.16)                     | 14           | 1079            | 2.06 (0.75-5.65)                     | 9            | 1464            | 0.57 (0.17-1.87)                          |
| 29.1 +                   | 66               | 7336            | 1.00 (0.51-1.95)                     | 47           | 4004            | 1.45 (0.63-3.37)                     | 19           | 3332            | 0.41 (0.15-1.12)                          |
| p for trend <sup>†</sup> |                  |                 | 0.78                                 |              |                 | 0.33                                 |              |                 | 0.21                                      |
| Linear BMI               |                  |                 | 1.00 (0.96-1.03);<br>p = 0.86        |              |                 | 1.01 (0.98-1.05);<br>p = 0.45        |              |                 | <b>0.935 (0.878-0.995);<br/>p = 0.034</b> |

Significant results are in bold

BMI = body mass index; No. = number

\*Adjusted for age (20-39, 40-59, > 60), Race (other Hispanic and other race were excluded due to small sample size), Education (Greater than, less than, or at High school level), Socioeconomic status, Comorbidities (asthma, hypertension, diabetes).

Gender-specific results were pooled while adjusting for gender in the total population model.

Socioeconomic status is calculated by the Center for Disease Control as a ratio of family income to the poverty line based on annual poverty guidelines specific to family size and geographic location issued by the Department of Health and Human services. Comorbidities are self-reported by patients based on if a physician has ever told them they have the condition (i.e. asthma, hypertension, diabetes).

<sup>†</sup> p for trend of categorical analysis of BMI

Table 3. Pooled and gender specific analysis of height adjusted for weight residuals in relation to steep cornea defined by high spherical dioptic power ( $\geq 48$  D).

| Total Population            |              |                 |                                            | Women                       |              |                 |                                            | Men                         |              |                 |                                      |
|-----------------------------|--------------|-----------------|--------------------------------------------|-----------------------------|--------------|-----------------|--------------------------------------------|-----------------------------|--------------|-----------------|--------------------------------------|
| Category of Height (inches) | No. of Cases | No. of Controls | *Multivariate Relative Risk (95% CI)       | Category of Height (inches) | No. of Cases | No. of Controls | *Multivariate Relative Risk (95% CI)       | Category of Height (inches) | No. of Cases | No. of Controls | *Multivariate Relative Risk (95% CI) |
| $\leq 62$                   | 53           | 2765            | Reference                                  | $\leq 61$                   | 31           | 1677            | Reference                                  | $\leq 66$                   | 15           | 1517            | Reference                            |
| 62.1-65                     | 46           | 4580            | <b>0.50 (0.31-0.81)</b>                    | 61.1-63                     | 34           | 2222            | 0.70 (0.36-1.39)                           | 66.1-68                     | 9            | 1875            | 0.30 (0.09-1.03)                     |
| 65.1-67                     | 22           | 3302            | <b>0.29 (0.16-0.55)</b>                    | 63.1-64                     | 13           | 1292            | <b>0.46 (0.24-0.88)</b>                    | 68.1-69                     | 10           | 1132            | 0.67 (0.20-2.16)                     |
| 67.1-70                     | 21           | 4245            | <b>0.17 (0.08-0.36)</b>                    | 64.1-66                     | 17           | 2376            | <b>0.35 (0.18-0.71)</b>                    | 69.1-71                     | 8            | 2196            | <b>0.25 (0.09-0.70)</b>              |
| 70.1+                       | 18           | 3269            | <b>0.18 (0.07-0.47)</b>                    | 66.1+                       | 9            | 1755            | <b>0.23 (0.10-0.55)</b>                    | 71.1 +                      | 14           | 2119            | 0.49 (0.14-1.73)                     |
| p for trend <sup>†</sup>    |              |                 | <b>&lt; 0.0001</b>                         |                             |              |                 | <b>&lt; 0.0001</b>                         |                             |              |                 | 0.46                                 |
| Linear Height               |              |                 | <b>0.84 (0.78-0.91);<br/>p &lt; 0.0001</b> |                             |              |                 | <b>0.81 (0.74-0.88);<br/>p &lt; 0.0001</b> |                             |              |                 | 0.88 (0.76-1.01);<br>p = 0.074       |

Significant results are in bold. No. = number

\*Adjusted for weight residuals (5 categories), age (20-39, 40-59, > 60 years), Race (other Hispanic and other race were excluded due to small sample size), Education (Greater than, less than, or at High school level), Socioeconomic status, Comorbidities (asthma, hypertension, diabetes).

Gender-specific results were pooled while adjusting for gender in the total population model.

Socioeconomic status is calculated by the Center for Disease Control as a ratio of family income to the poverty line based on annual poverty guidelines specific to family size and geographic location issued by the Department of Health and Human services. Comorbidities are self-reported by patients based on if a physician has ever told them they have the condition (i.e. asthma, hypertension, diabetes).

<sup>†</sup> p for trend of categorical analysis of height



Table 4. Pooled and gender-specific analysis of weight adjusted for height residuals in relation to steep cornea defined by high spherical dioptric power ( $\geq 48$  D)

| Total Population              |              |                 |                                            | Women                       |              |                 |                                      | Men                         |              |                 |                                            |
|-------------------------------|--------------|-----------------|--------------------------------------------|-----------------------------|--------------|-----------------|--------------------------------------|-----------------------------|--------------|-----------------|--------------------------------------------|
| Category of weight (pounds)   | No. of Cases | No. of Controls | *Multivariate Relative Risk (95% CI)       | Category of weight (pounds) | No. of Cases | No. of Controls | *Multivariate Relative Risk (95% CI) | Category of weight (pounds) | No. of Cases | No. of Controls | *Multivariate Relative Risk (95% CI)       |
| $\leq 140$                    | 45           | 3401            | Reference                                  | $\leq 128$                  | 23           | 1552            | Reference                            | $\leq 153$                  | 12           | 1400            | Reference                                  |
| 140.1 - 160                   | 31           | 3371            | 0.73 (0.41-1.31)                           | 128.1-148                   | 20           | 1981            | 0.73 (0.34-1.55)                     | 153.1-173                   | 11           | 1774            | 0.64 (0.20-2.09)                           |
| 160.1 - 180                   | 29           | 3657            | 0.61 (0.30-1.24)                           | 148.1-168                   | 24           | 1975            | 0.94 (0.45-1.94)                     | 173.1-182                   | 11           | 969             | 1.28 (0.38-4.29)                           |
| 180.1 - 200                   | 24           | 2966            | 0.56 (0.31-1.01)                           | 168.1-188                   | 12           | 1488            | 0.56 (0.23-1.38)                     | 182.1-202                   | 10           | 1798            | 0.43 (0.16-1.18)                           |
| 200.1 +                       | 31           | 4766            | <b>0.45 (0.24-0.85)</b>                    | 188.1 +                     | 25           | 2326            | 0.90 (0.47-1.74)                     | 202.1 +                     | 12           | 2898            | 0.38 (0.13-1.08)                           |
| p for trend <sup>†</sup>      |              |                 | <b>p = 0.011</b>                           |                             |              |                 | p = 0.75                             |                             |              |                 | <b>p = 0.024</b>                           |
| Linear weight (per pound)     |              |                 | <b>0.992 (0.987-0.997)</b>                 |                             |              |                 | 0.999 (0.992-1.005)                  |                             |              |                 | <b>0.988 (0.979-0.997)</b>                 |
| Linear weight (per 10 pounds) |              |                 | <b>0.927 (0.882-0.975);<br/>p = 0.0038</b> |                             |              |                 | 0.986 (0.926-1.049);<br>p = 0.64     |                             |              |                 | <b>0.885 (0.809-0.968);<br/>p = 0.0083</b> |

Significant results are in bold. No. = number

\*Adjusted for height residuals (5 categories), age (20-39, 40-59, > 60 years), Race (other Hispanic and other race were excluded due to small sample size), Education (Greater than, less than, or at High school level), Socioeconomic status, Comorbidities (asthma, hypertension, diabetes).

Gender-specific results were pooled while adjusting for gender in the total population model.

Socioeconomic status is calculated by the Center for Disease Control as a ratio of family income to the poverty line based on annual poverty guidelines specific to family size and geographic location issued by the Department of Health and Human services. Comorbidities are self-reported by patients based on if a physician has ever told them they have the condition (i.e. asthma, hypertension, diabetes).

<sup>†</sup> p for trend of categorical analysis of weight

13 Supplemental Tables:

14

15 Table S1: Gender specific demographic and other characteristics of the National Health and  
16 Nutrition Examination Survey sample stratified by keratometry readings

17

18 Table S2-S5: Analysis of Interaction between Gender and Anthropometric features in relation to  
19 steep cornea defined by high spherical dioptric power ( $> 48$  D) and normal level of spherical  
20 dioptric power ( $\leq 48$  D)

21

22 As described in methods on regression models, analysis of interactions between gender and  
23 anthropometric features was conducted. An interaction term between gender and an  
24 anthropometric feature (Table S2-S4) was included in regression models. Height categories  
25 were additionally adjusted for inherent differences in height between men and women (Table  
26 S5). Quintiles by height were calculated separately for women and then men in order to adjust  
27 for inherent gender differences in height.

28

Table S1: Gender specific demographic and other characteristics of the National Health and Nutrition Examination Survey sample stratified by keratometry readings

| Characteristics                | Men                           |            |                                 |            | Women                         |            |                                 |            |
|--------------------------------|-------------------------------|------------|---------------------------------|------------|-------------------------------|------------|---------------------------------|------------|
|                                | Spherical power < 48 diopters |            | Spherical power ≥ 48.0 diopters |            | Spherical power < 48 diopters |            | Spherical power ≥ 48.0 diopters |            |
|                                | Number                        | Percentage | Number                          | Percentage | Number                        | Percentage | Number                          | Percentage |
| <b>Age (years)</b>             |                               |            |                                 |            |                               |            |                                 |            |
| 20 – 39                        | 3280                          | 40.4       | 17                              | 41.0       | 3967                          | 38.2       | 46                              | 41.3       |
| 40 – 59                        | 3098                          | 39.8       | 16                              | 36.0       | 3068                          | 38.5       | 37                              | 39.0       |
| ≥ 60                           | 3309                          | 19.8       | 25                              | 23.0       | 3272                          | 23.3       | 30                              | 19.6       |
| <b>Race</b>                    |                               |            |                                 |            |                               |            |                                 |            |
| Mexican American               | 1920                          | 8.0        | 13                              | 8.1        | 2082                          | 6.5        | 21                              | 6.0        |
| Other Hispanic                 | 505                           | 4.7        | 2                               | 1.7        | 593                           | 5.0        | 6                               | 3.2        |
| Non-Hispanic white             | 5021                          | 72.8       | 36                              | 82.6       | 5208                          | 72.6       | 61                              | 74.7       |
| Non-Hispanic black             | 1898                          | 9.7        | 7                               | 7.6        | 2032                          | 11.1       | 22                              | 11.9       |
| Other race                     | 343                           | 4.8        | 0                               | 0          | 392                           | 4.8        | 3                               | 4.2        |
| <b>Education</b>               |                               |            |                                 |            |                               |            |                                 |            |
| Less than High School          | 2957                          | 19.2       | 17                              | 14.2       | 2864                          | 17.8       | 32                              | 23.1       |
| High School                    | 2337                          | 25.8       | 19                              | 38.1       | 2474                          | 25.2       | 29                              | 21.5       |
| Greater than High School       | 4393                          | 55.0       | 22                              | 47.6       | 4969                          | 57.0       | 52                              | 55.4       |
| <b>Socioeconomic Status*</b>   |                               |            |                                 |            |                               |            |                                 |            |
| Above Poverty Line             | 8077                          | 88.8       | 42                              | 81.6       | 8264                          | 85.5       | 89                              | 84.9       |
| Below Poverty Line             | 1610                          | 11.2       | 16                              | 18.4       | 2043                          | 14.5       | 24                              | 15.1       |
| <b>Comorbidities*</b>          |                               |            |                                 |            |                               |            |                                 |            |
| Asthma                         | 992                           | 11.1       | 6                               | 13.4       | 1407                          | 14.6       | 26                              | 27.9       |
| High blood pressure            | 3041                          | 26.5       | 22                              | 29.4       | 3352                          | 29.0       | 33                              | 24.2       |
| Diabetes                       | 1037                          | 7.2        | 10                              | 9.9        | 1004                          | 7.1        | 11                              | 9.0        |
| <b>Height (inches)</b>         |                               |            |                                 |            |                               |            |                                 |            |
| ≤ 62                           | 117                           | 0.7        | 3                               | 3.4        | 3143                          | 23.0       | 56                              | 38.5       |
| 62.1-65                        | 949                           | 6.0        | 7                               | 11.4       | 4126                          | 41.7       | 41                              | 40.8       |
| 65.1-67                        | 1635                          | 13.2       | 13                              | 18.0       | 2008                          | 22.7       | 12                              | 14.6       |
| 67.1-70                        | 3676                          | 38.0       | 17                              | 26.3       | 934                           | 11.3       | 4                               | 6.1        |
| 70.1 +                         | 3310                          | 42.2       | 18                              | 40.9       | 96                            | 1.2        | 0                               | 0          |
| <b>Weight (pounds)</b>         |                               |            |                                 |            |                               |            |                                 |            |
| ≤ 140                          | 774                           | 6.4        | 7                               | 32.4       | 3163                          | 13.2       | 43                              | 38.4       |
| 140.1-160                      | 1507                          | 13.7       | 12                              | 21.5       | 2249                          | 16.9       | 21                              | 19.3       |
| 160.1-180                      | 2148                          | 21.4       | 14                              | 17.3       | 1856                          | 28.4       | 18                              | 11.9       |
| 180.1-200                      | 2022                          | 21.3       | 11                              | 10.9       | 1183                          | 15.5       | 13                              | 11.4       |
| 200.1 +                        | 3236                          | 37.2       | 14                              | 18.0       | 1856                          | 26.0       | 18                              | 19.0       |
| <b>Body Mass Index (kg/m2)</b> |                               |            |                                 |            |                               |            |                                 |            |
| ≤ 22                           | 978                           | 9.9        | 10                              | 17.6       | 1449                          | 17.4       | 13                              | 13.3       |
| 22.1-25                        | 1871                          | 19.6       | 7                               | 15.7       | 1901                          | 20.6       | 23                              | 21.2       |
| 25.1-27                        | 1632                          | 16.8       | 11                              | 17.3       | 1386                          | 12.9       | 12                              | 11.9       |
| 27.1-29                        | 1596                          | 16.1       | 9                               | 17.1       | 1208                          | 10.7       | 15                              | 14.1       |
| 29.1 +                         | 3610                          | 37.6       | 21                              | 32.3       | 4363                          | 38.5       | 50                              | 39.6       |

29 \*Socioeconomic status is calculated by the Center for Disease Control as a ratio of family income to the poverty  
30 line based on annual poverty guidelines specific to family size and geographic location issued by the Department of  
31 Health and Human services. Comorbidities are self-reported by patients based on if a physician has ever told them  
32 they have the condition (i.e. asthma, hypertension, diabetes).

Table S2. Analysis of Interaction between Gender and Body mass index (kg/m<sup>2</sup>) in relation to steep cornea defined by high spherical dioptric power (> 48 D) and normal level of spherical dioptric power (≤ 48 D)

| Category of BMI (kg/m <sup>2</sup> ) | Men          |                 | Women        |                 | Categorical Interaction*         |              |
|--------------------------------------|--------------|-----------------|--------------|-----------------|----------------------------------|--------------|
|                                      | No. of Cases | No. of Controls | No. of Cases | No. of Controls | Interaction coefficient (95% CI) | p-value      |
| ≤ 22                                 | 10           | 877             | 12           | 1285            | Reference                        |              |
| 22.1-25                              | 7            | 1687            | 19           | 1711            | 0.96 (-0.59, 2.51)               | 0.23         |
| 25.1-27                              | 11           | 1479            | 12           | 1243            | 0.84 (-0.86, 2.55)               | 0.33         |
| 27.1-29                              | 9            | 1464            | 14           | 1079            | 1.15 (-0.21, 2.52)               | 0.10         |
| 29.1+                                | 19           | 3332            | 47           | 4004            | 1.12 (-0.13, 2.37)               | 0.08         |
|                                      |              |                 |              |                 | p for categorical interaction    | 0.41         |
|                                      |              |                 |              | Linear BMI      | <b>0.07 (0.01, 0.13)</b>         | <b>0.035</b> |

BMI = body mass index. No. = number

\*Adjusted for gender (men were the reference group), age (20-39, 40-59, > 60), Race (other Hispanic and other race were excluded due to small sample size), Education (Greater than, less than, or at High school level), Socioeconomic status, Comorbidities (asthma, hypertension, diabetes).

Socioeconomic status is calculated by the Center for Disease Control as a ratio of family income to the poverty line based on annual poverty guidelines specific to family size and geographic location issued by the Department of Health and Human services. Comorbidities are self-reported by patients based on if a physician has ever told them they have the condition (i.e. asthma, hypertension, diabetes).

Table S3. Analysis of Interaction between Gender and Height (inches) in relation to steep cornea defined by high spherical dioptic power (> 48 D) and normal level of spherical dioptic power ( $\leq$  48 D)

| Category of Height (inches) | Men          |                 | Women                                    |                          |
|-----------------------------|--------------|-----------------|------------------------------------------|--------------------------|
|                             | No. of Cases | No. of Controls | No. of Cases                             | No. of Controls          |
| <62                         | 3            | 90              | 50                                       | 2675                     |
| 62.1-65                     | 7            | 797             | 39                                       | 3783                     |
| 65.1-67                     | 11           | 1414            | 11                                       | 1888                     |
| 67.1-70                     | 17           | 3363            | 4                                        | 882                      |
| 70.1+                       | 18           | 3175            | 0                                        | 94                       |
|                             |              |                 | <i>Interaction coefficient (95% CI)*</i> | <i>p-value</i>           |
|                             |              |                 | Linear height                            | -0.03 (-0.08, 0.03) 0.35 |

No. = number

\*Adjusted for gender (men were the reference group), weight residuals, age (20-39, 40-59, > 60), Race (other Hispanic and other race were excluded due to small sample size), Education (Greater than, less than, or at High school level), Socioeconomic status, Comorbidities (asthma, hypertension, diabetes).

Socioeconomic status is calculated by the Center for Disease Control as a ratio of family income to the poverty line based on annual poverty guidelines specific to family size and geographic location issued by the Department of Health and Human services. Comorbidities are self-reported by patients based on if a physician has ever told them they have the condition (i.e. asthma, hypertension, diabetes).

Non-overlapping height distributions in men and women limited categorical interaction analysis. We sought to instead use continuous height to assess this interaction. Additional analysis adjusting for inherent gender differences is shown in table S5.

Table S4. Analysis of Interaction between Gender and Weight (pounds) in relation to steep cornea defined by high spherical dioptric power (> 48 D) and normal level of spherical dioptric power ( $\leq$  48 D)

| Category of Weight (pounds) | Men          |                 | Women        |                 | Categorical Interaction*         |         |
|-----------------------------|--------------|-----------------|--------------|-----------------|----------------------------------|---------|
|                             | No. of Cases | No. of Controls | No. of Cases | No. of Controls | Interaction coefficient (95% CI) | p-value |
| $\leq$ 140                  | 7            | 646             | 38           | 2755            | Reference                        |         |
| 140.1 - 160                 | 12           | 1327            | 19           | 2044            | 0.27 (-0.92, 1.46)               | 0.66    |
| 160.1 - 180                 | 13           | 1962            | 16           | 1695            | -0.18 (-1.65, 1.29)              | 0.81    |
| 180.1 - 200                 | 11           | 1862            | 13           | 1104            | 0.81 (-0.68, 2.31)               | 0.29    |
| 200.1 +                     | 13           | 3042            | 18           | 1724            | 0.80 (-0.63, 2.22)               | 0.28    |
|                             |              |                 |              |                 | p for categorical interaction    | 0.61    |
|                             |              |                 |              | Linear Weight   | 0.02 (-0.01, 0.04)               | 0.16    |

No. = number

\*Adjusted for gender (men were the reference group), height residuals, age (20-39, 40-59, > 60), Race (other Hispanic and other race were excluded due to small sample size), Education (Greater than, less than, or at High school level), Socioeconomic status, Comorbidities (asthma, hypertension, diabetes).

Socioeconomic status is calculated by the Center for Disease Control as a ratio of family income to the poverty line based on annual poverty guidelines specific to family size and geographic location issued by the Department of Health and Human services. Comorbidities are self-reported by patients based on if a physician has ever told them they have the condition (i.e. asthma, hypertension, diabetes).

Table S5. Analysis of Interaction between Gender and Gender-stratified quintiles of Height in relation to steep cornea defined by high spherical dioptic power (> 48 D) and normal level of spherical dioptic power ( $\leq$  48 D)

| Height Quintile               | Men          |                 | Women        |                 | Categorical Interaction*         |         |
|-------------------------------|--------------|-----------------|--------------|-----------------|----------------------------------|---------|
|                               | No. of Cases | No. of Controls | No. of Cases | No. of Controls | Interaction coefficient (95% CI) | p-value |
| 1                             | 15           | 1736            | 36           | 1829            | Reference                        |         |
| 2                             | 11           | 1748            | 28           | 1836            | 0.37 (-0.86, 1.60)               | 0.56    |
| 3                             | 11           | 1802            | 16           | 1908            | 0.08 (-0.94, 1.10)               | 0.88    |
| 4                             | 10           | 1779            | 13           | 1851            | -0.70 (-1.83, 0.43)              | 0.23    |
| 5                             | 9            | 1774            | 11           | 1898            | 0.18 (-1.08, 1.45)               | 0.78    |
| p for categorical interaction |              |                 |              |                 |                                  | 0.59    |

No. = number

\*Adjusted for gender (men were the reference group), age (20-39, 40-59, > 60), Race (other Hispanic and other race were excluded due to small sample size), Education (Greater than, less than, or at High school level), Socioeconomic status, Comorbidities (asthma, hypertension, diabetes).

Socioeconomic status is calculated by the Center for Disease Control as a ratio of family income to the poverty line based on annual poverty guidelines specific to family size and geographic location issued by the Department of Health and Human services. Comorbidities are self-reported by patients based on if a physician has ever told them they have the condition (i.e. asthma, hypertension, diabetes).

44 **Confounding effects of anthropometric features on the association between gender and steep cornea**

45 Prior to including anthropometric features in our model, women had greater odds of steep cornea (OR, 1.85; 95% CI 1.20-2.86; p= 0.0064).  
46 This relationship persisted with a similar degree of association upon addition of continuous BMI to the regression (OR, 1.85; 95% CI 1.20-  
47 2.86). However, when included in regression models height or weight confounded this relationship with a substantial change in the degree  
48 of association between gender and steep cornea.<sup>12</sup> The degree of association between female gender and steep cornea was substantially  
49 weaker when adjusted for continuous height (OR, 0.75; 95% CI 0.43-1.30) or continuous weight (OR, 1.61; 95% CI 1.01-2.58).
